# Supplementary material for: Characteristics of two-dimensional millimetric microarrays of TiO2 nanowires and their photocatalytic properties
Source: Royal Society of Chemistry journal article supplement (doi:10.1039/c6ra04979f), 2016-01-01
Supplement: c6ra04979f1.pdf [file c6ra04979f1.pdf]

## Supporting Information

### Characteristic of Two-dimensional Millimetric Microarrays TiO<sub>2</sub>

#### Nanowires and their Photocatalytic Properties

Yanqing Wang,<sup>a</sup> Yunchong Fu,<sup>b</sup> Chuanxin Hou,<sup>b</sup> Yanjie Zhai,<sup>b</sup> Feng Dang,<sup>\*b</sup> Hong Lin,<sup>c</sup> and Yuqi Fan<sup>\*d</sup>

<sup>a</sup>School of Materials Science and Engineering China University of Mining and Technology, Xuzhou 221116, China

<sup>b</sup>Key Laboratory for Liquid-Solid Structural Evolution and Processing of Materials (Ministry of Education), Shandong University, Jinan 250061, China.

<sup>c</sup>State Key Laboratory of New Ceramic and Fine Processing, Tsinghua University, Beijing, China

<sup>d</sup>Faculty of Life and Environmental Sciences, University of Tsukuba, 1-1-1 Tennodai, Tsukuba, Ibaraki 305-8572, Japan

Corresponding author E-mail: [dangfeng@sdu.edu.cn](mailto:dangfeng@sdu.edu.cn)

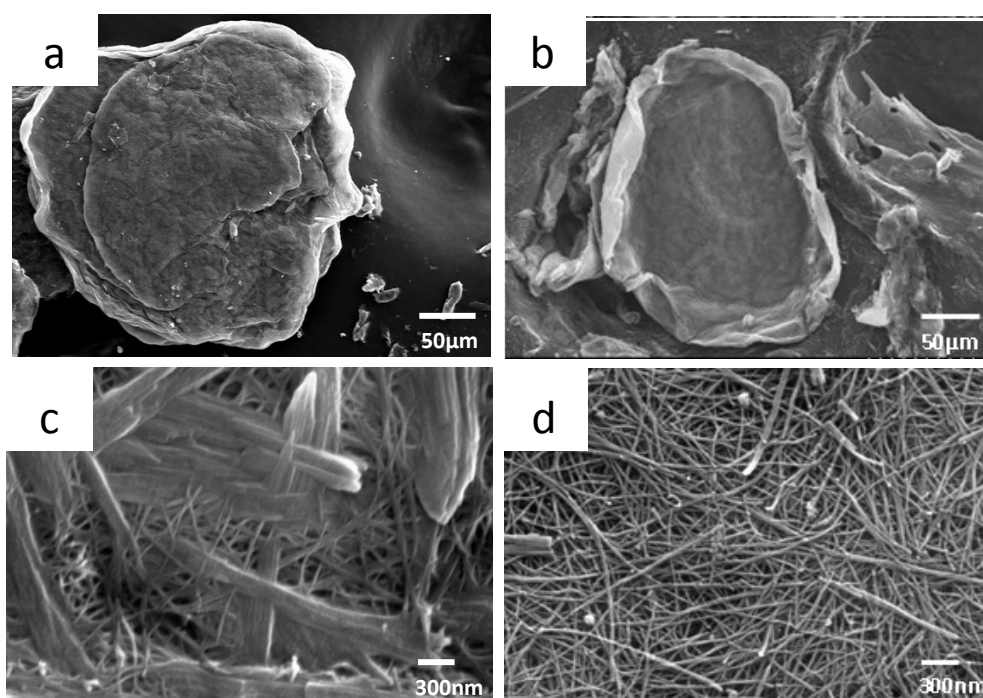

**Fig. S1** SEM images of the TiO<sub>2</sub> nanowires synthesized at Ti: OLA : hydrazine=1: 2: 4 at 180°C (a, c) and 220°C (b, d) for 24 h.

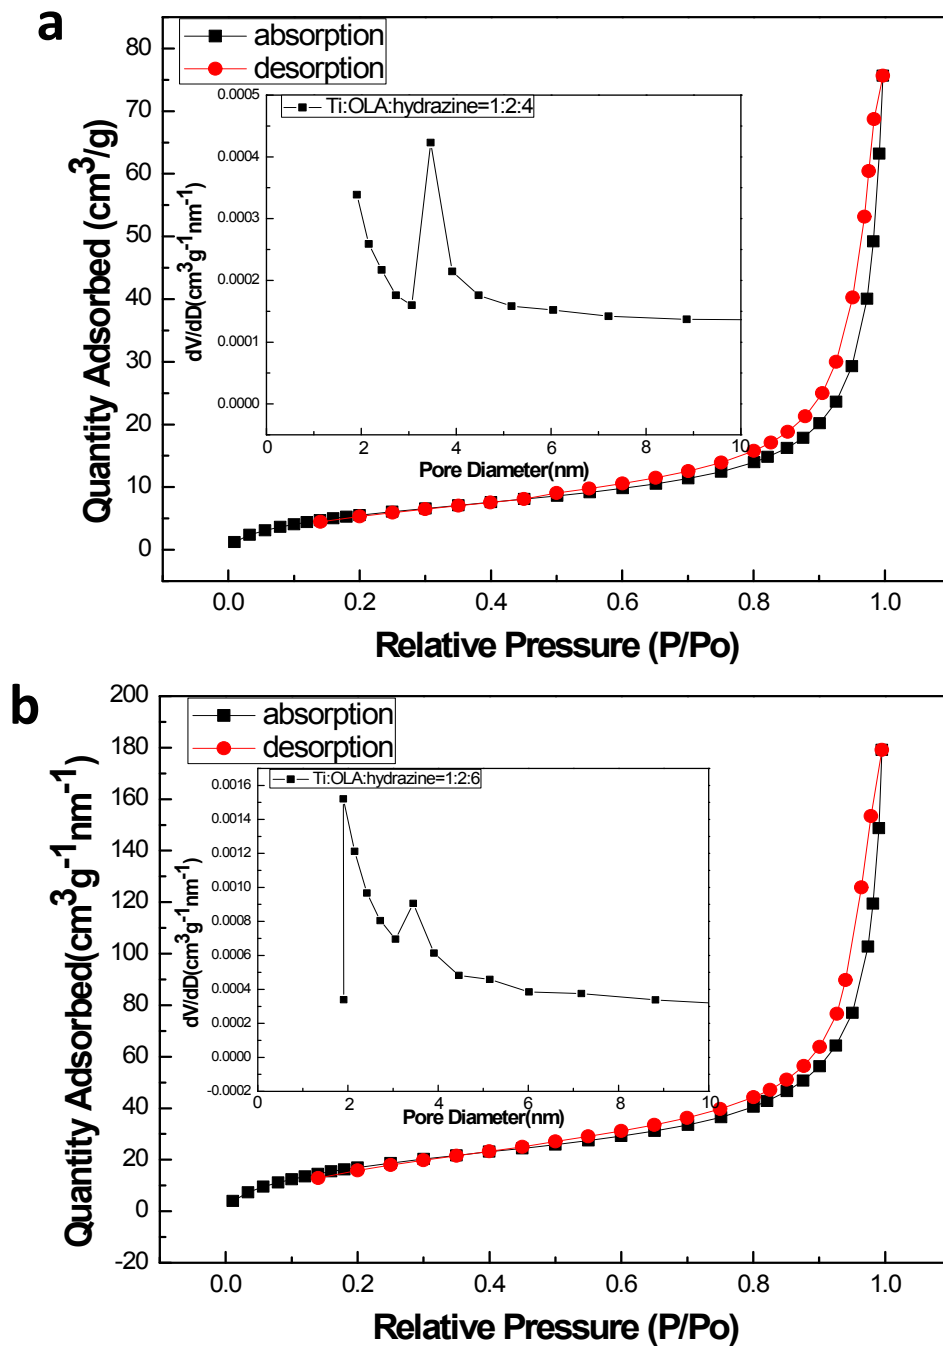

Fig. S2 N<sub>2</sub> adsorption-desorption isotherm (black, adsorption; red, desorption) and pore size distribution of TiO<sub>2</sub> nanowire synthesized at Ti: OLA: hydrazine=1: 2: 4 (a) and 1: 2: 6 (b) at 200°C for 24 h.
